# Supplementary material for: Interspecies recombination, not de novo mutation, maintains virulence after β-lactam resistance acquisition in Streptococcus pneumoniae
Source: PubMed Central journal article supplement — Cell Rep. Author manuscript; Available in PMC 2023 Jan 19. (PMC9850807; doi:10.1016/j.celrep.2022.111835), 2022-12-13
Supplement: NIHMS1857934-supplement-1.pdf [file NIHMS1857934-supplement-1.pdf]

Cell Reports, Volume 41

## Supplemental information

**Interspecies recombination, not *de novo*  
mutation, maintains virulence after  $\beta$ -lactam  
resistance acquisition in *Streptococcus pneumoniae***

Andrew T. Nishimoto, Tina H. Dao, Qidong Jia, Juan C. Ortiz-Marquez, Haley Echlin, Peter Vogel, Tim van Opijnen, and Jason W. Rosch

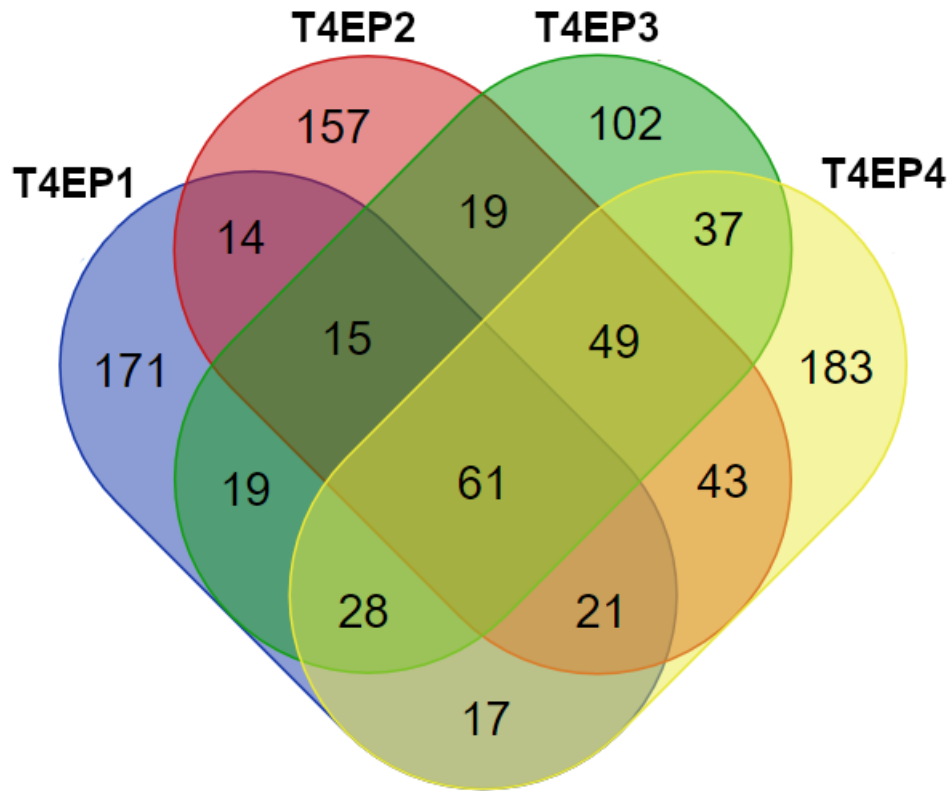

**Figure S1. Genome variations between in vitro-evolved populations.** Venn diagram illustrates unique versus shared positional variations in the TIGR4 genome between penicillin-passaged populations T4EP1 through T4EP4. Numbers in overlapped areas represent the number of shared positional variations (SNPs and indels) detected in the genome sequences of the overlapping populations at any of four distinct timepoints during passaging (Day 7, 14, 21, and 32). Unique variations are listed within the non-overlapping spaces of each population.

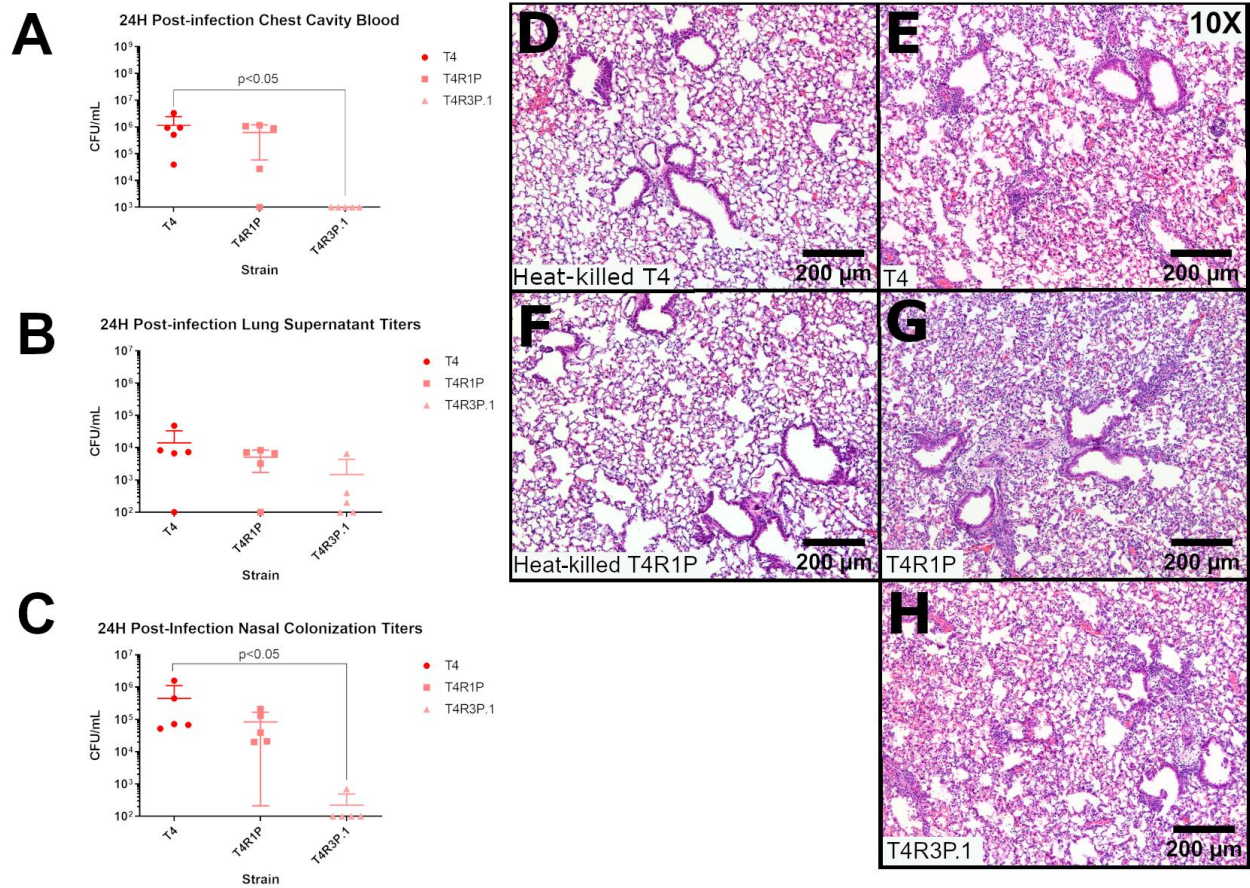

**Figure S2. Bacterial burden in the blood and lungs and nasal colonization 24-hours post-intranasal challenge and pulmonary histopathology of murine lungs infected with recombinant mutants vs. respective wild-type strains.** Pneumococcal titers from chest cavity blood (A), lung tissue (B), or nasal passages (C) were obtained 24 hours after intranasal infection with T4, the first-round recombinant T4R1P, or the third-round recombinant T4R3P.1 (n=5 mice/group). (D-H) Representative images of right lobar sections 24 hours post-infection are shown at 10 $\times$  magnification for heat-killed T4 (D), T4 (E), heat-killed T4R1P (F), T4R1P (G), and T4R3P.1 (H) strains used in the respective infected mice (n=5 mice/ non-heat-killed strains, and n=3 mice/heat-killed strains).

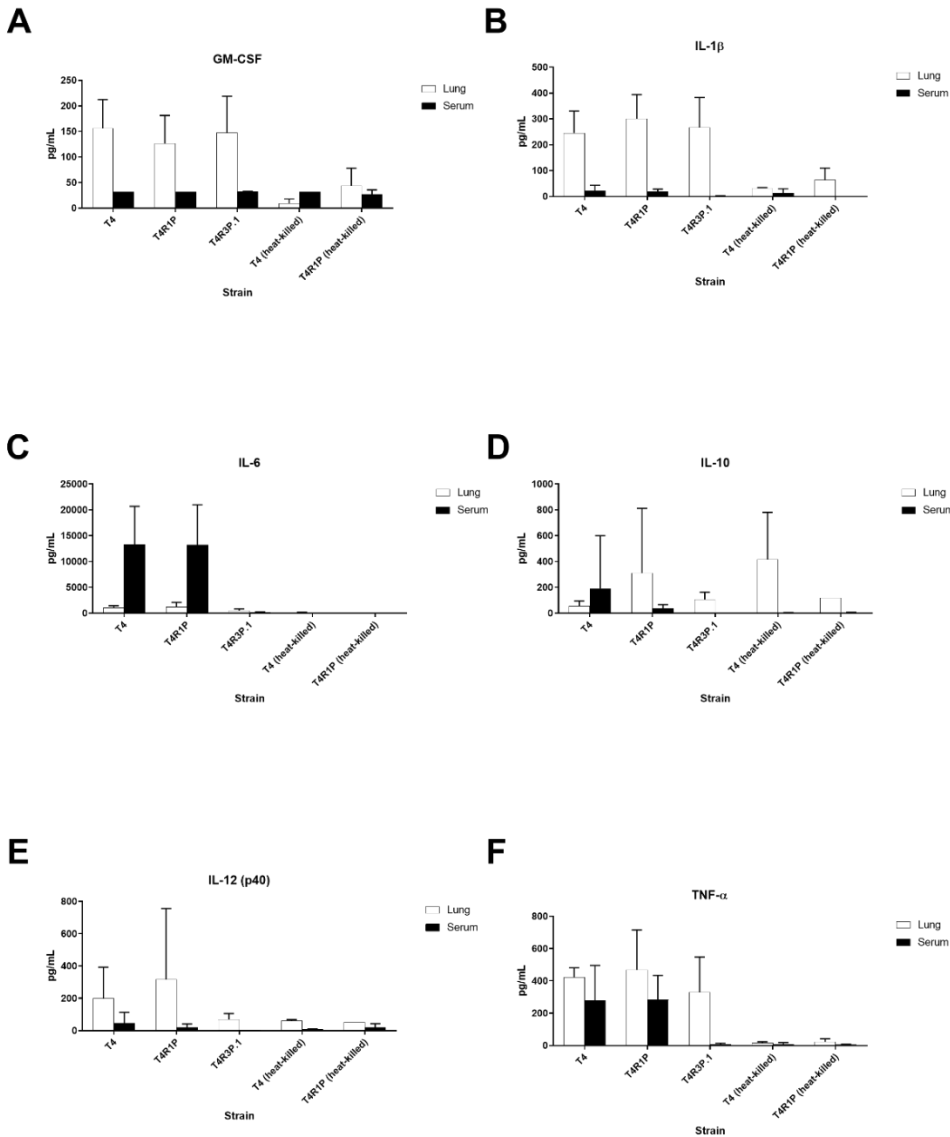

**Figure S3. Cytokine profiles in collected serum and lung tissue in a murine intranasal infection model 24 hours post-infection.** Concentrations in the serum or lung tissue of infected mice for GM-CSF (A), IL-1 $\beta$  (B), IL-6 (A), IL-10 (A), IL-12 (p40) (E), and TNF- $\alpha$  (F) are shown for T4 and recombinant pneumococcal strains T4R1P and T4R3P.1, as well as heat-killed counterparts. Results are based on five mice (biological replicates) per non-heat-killed strain, with serum and lung samples run in technical duplicate. Results for heat-killed strains were performed in biological triplicate.

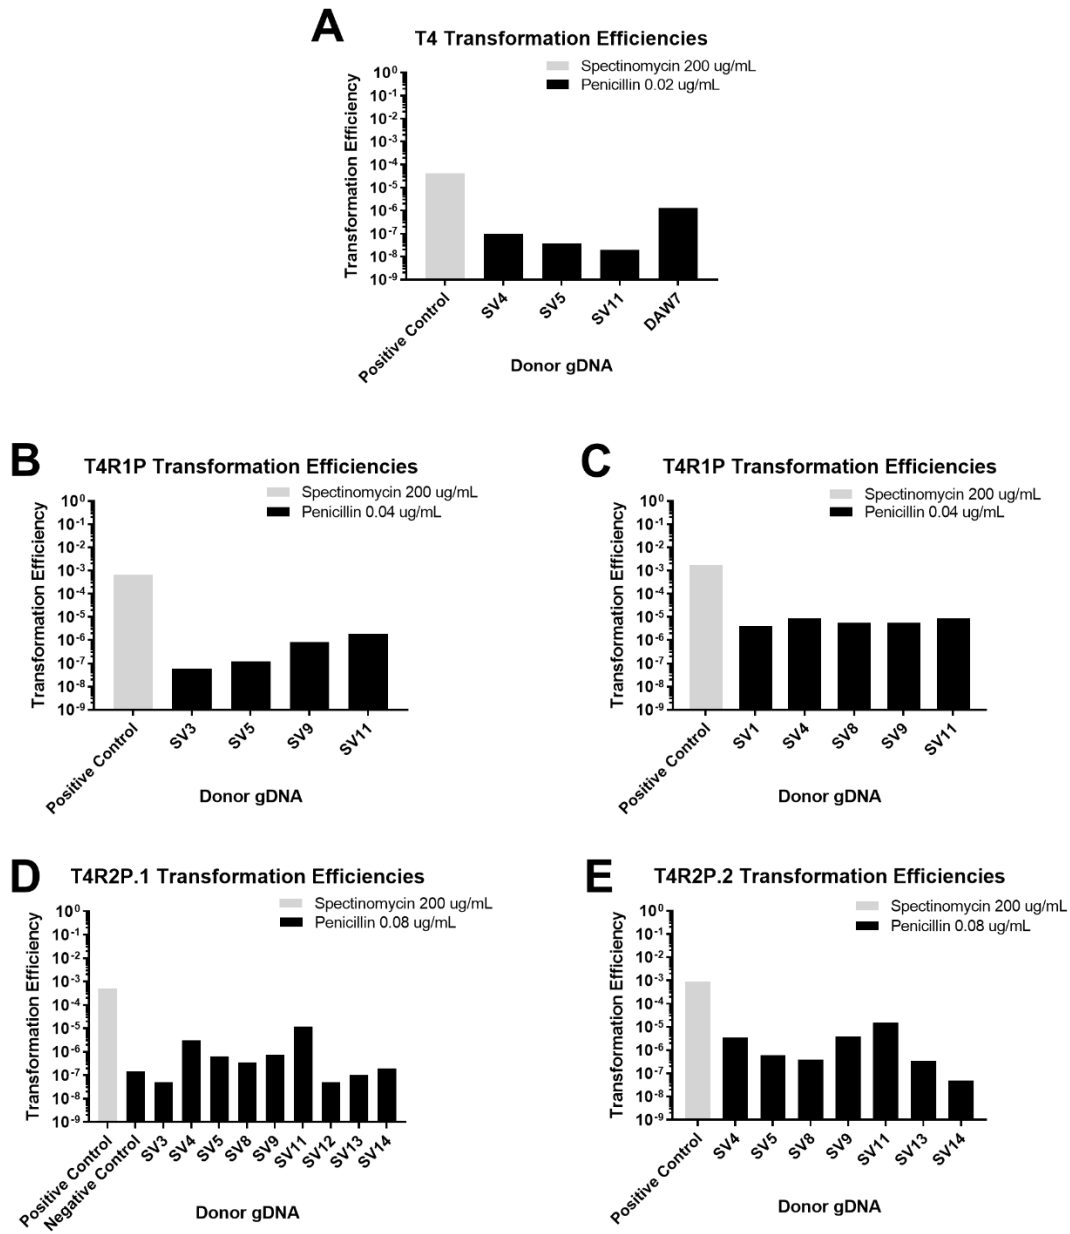

**Figure S4. Transformation efficiencies of the parental TIGR4 strain with genomic DNA from viridans group streptococci.** Transformation efficiency was calculated as the ratio of the number of recombinant CFUs selected on penicillin-containing blood agar plates to the total number of CFUs. (A) First-round transformation efficiencies, second-round transformation efficiencies (B, C), and third-round transformation efficiencies of the T4 parental strain were calculated. Positive-control transformation efficiencies were generated from Tn-Seq library gDNA.

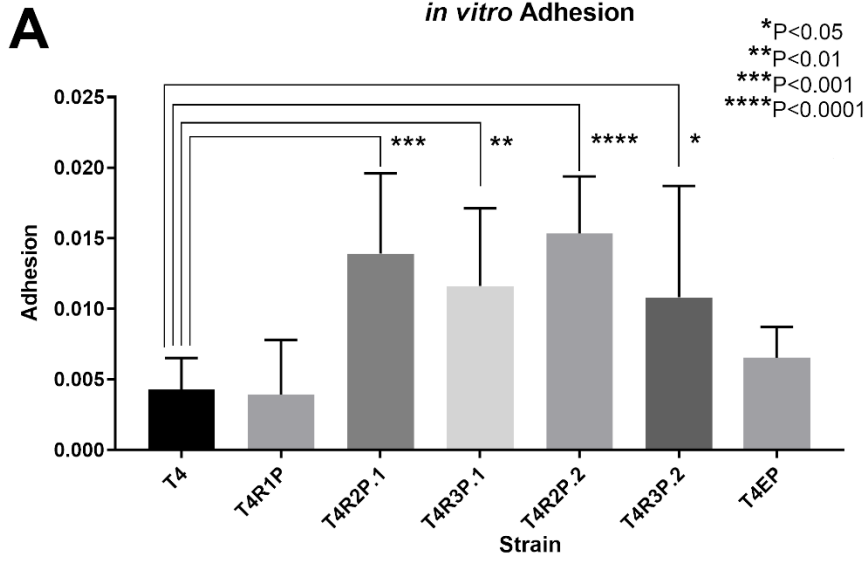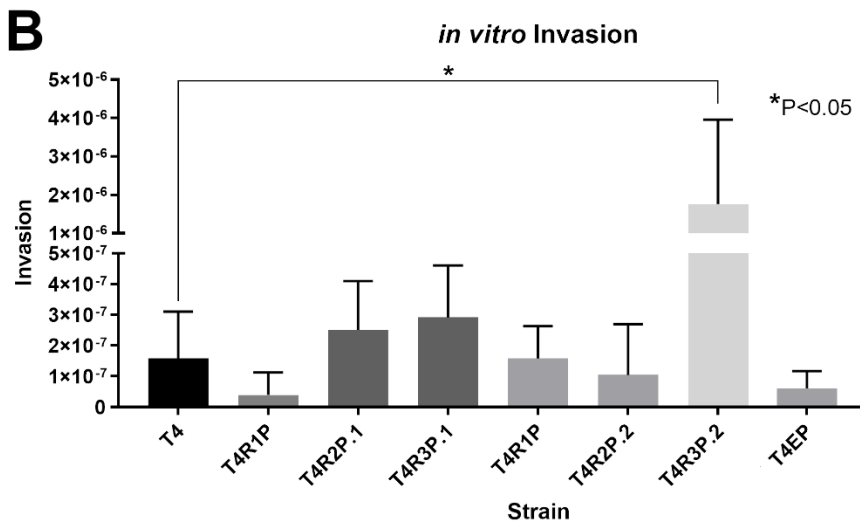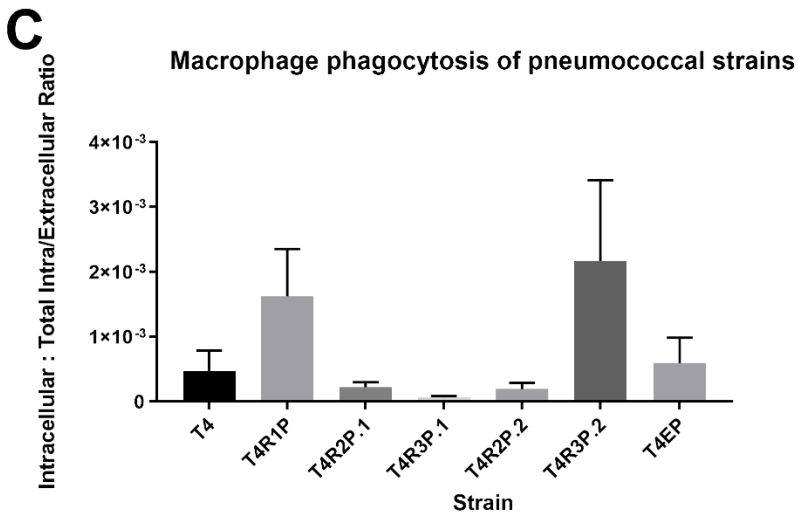

**Figure S5. Adhesion, invasion, and macrophage phagocytosis assays for recombinant pneumococcal strains versus parental strains and experimentally evolved populations.** (A) Adhesion assays using A549 murine lung epithelial cells were performed to examine the adhesion of recombinant, *in vitro*-evolved, and WT strains. Adhesion ratio was calculated as the ratio of the number of adhered CFUs to the total number of CFUs, which was the sum of adherent and nonadherent CFUs. (B) Invasion assays using A549 murine lung epithelial cells were performed to examine the invasive ability of the same strains as in (A). Invasion ratio was calculated as the ratio of the number of adhered CFUs to the total number of CFUs at the time of plating. The total bacterial number expressed as CFUs was the sum of invaded (engulfed) and remaining bacteria in the supernatant. In both the adhesion and invasion assays, each strain was measured in 3 biological replicates. (C) Recombinants and their respective WT strains were incubated with activated J774A.1 murine macrophage cells at an approximate MOI of 50. Macrophage-killing assays were conducted in three biological replicates. The recombinants and experimentally evolved strains were compared to their respective parental strains via the Mann-Whitney test.

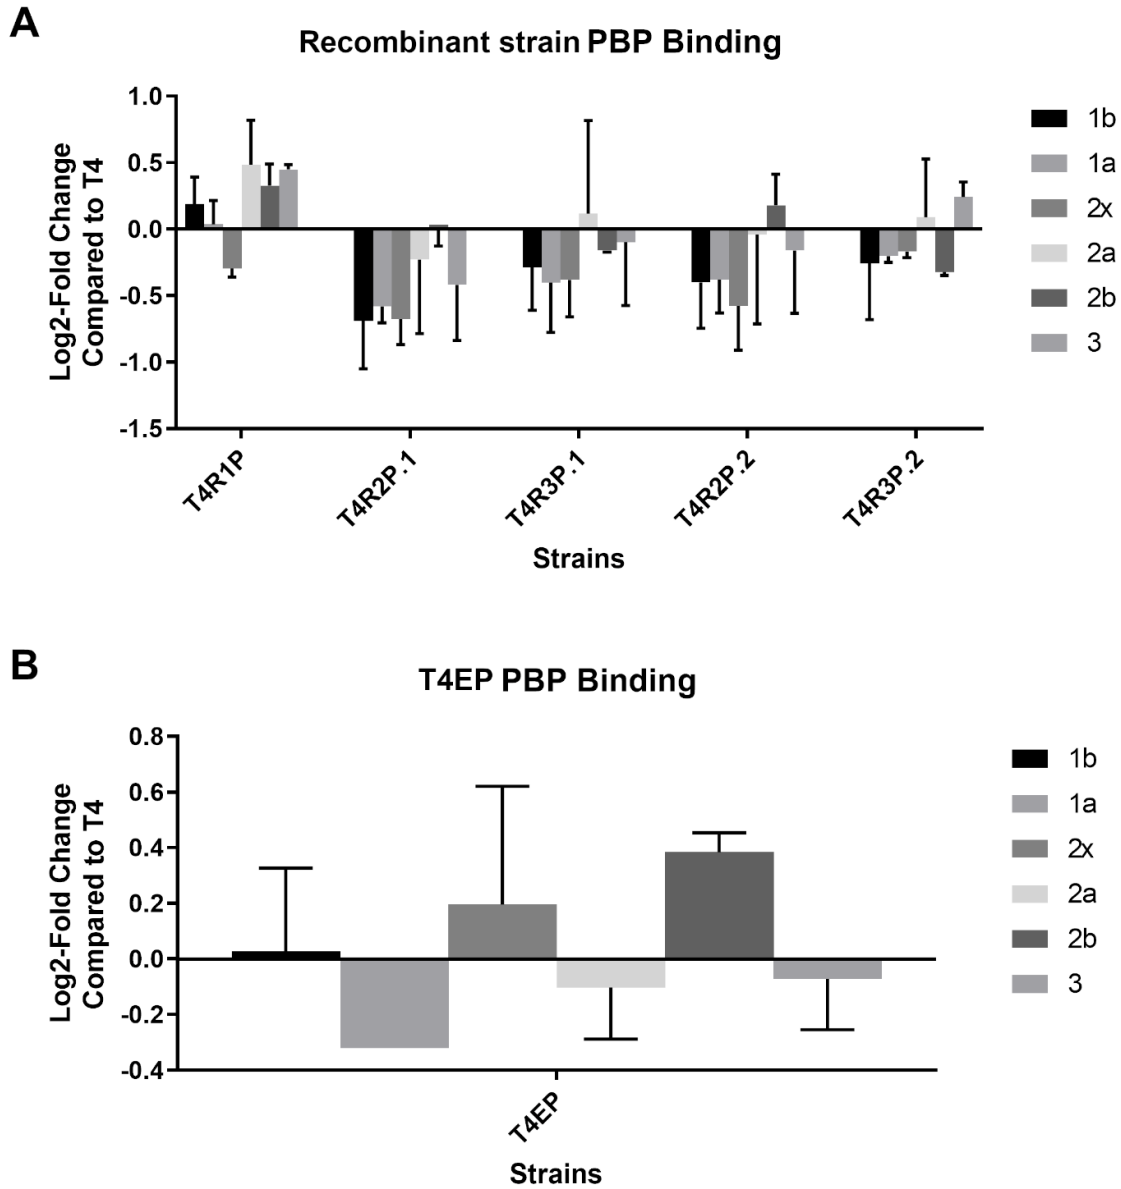

**Figure S6. BOCILLIN FL-binding assay in recombinant strains, parental strains, and experimentally evolved pneumococci.** The T4-derived recombinants (A) and experimentally evolved T4EP (B) were transiently exposed to BOCILLIN FL, and the fluorescent band intensities for six PBPs were visualized and quantified. Differences in the affinity of BOCILLIN FL for PBPs from the derivatives was compared to that for the parental strain and is expressed as log-fold change in band intensity.



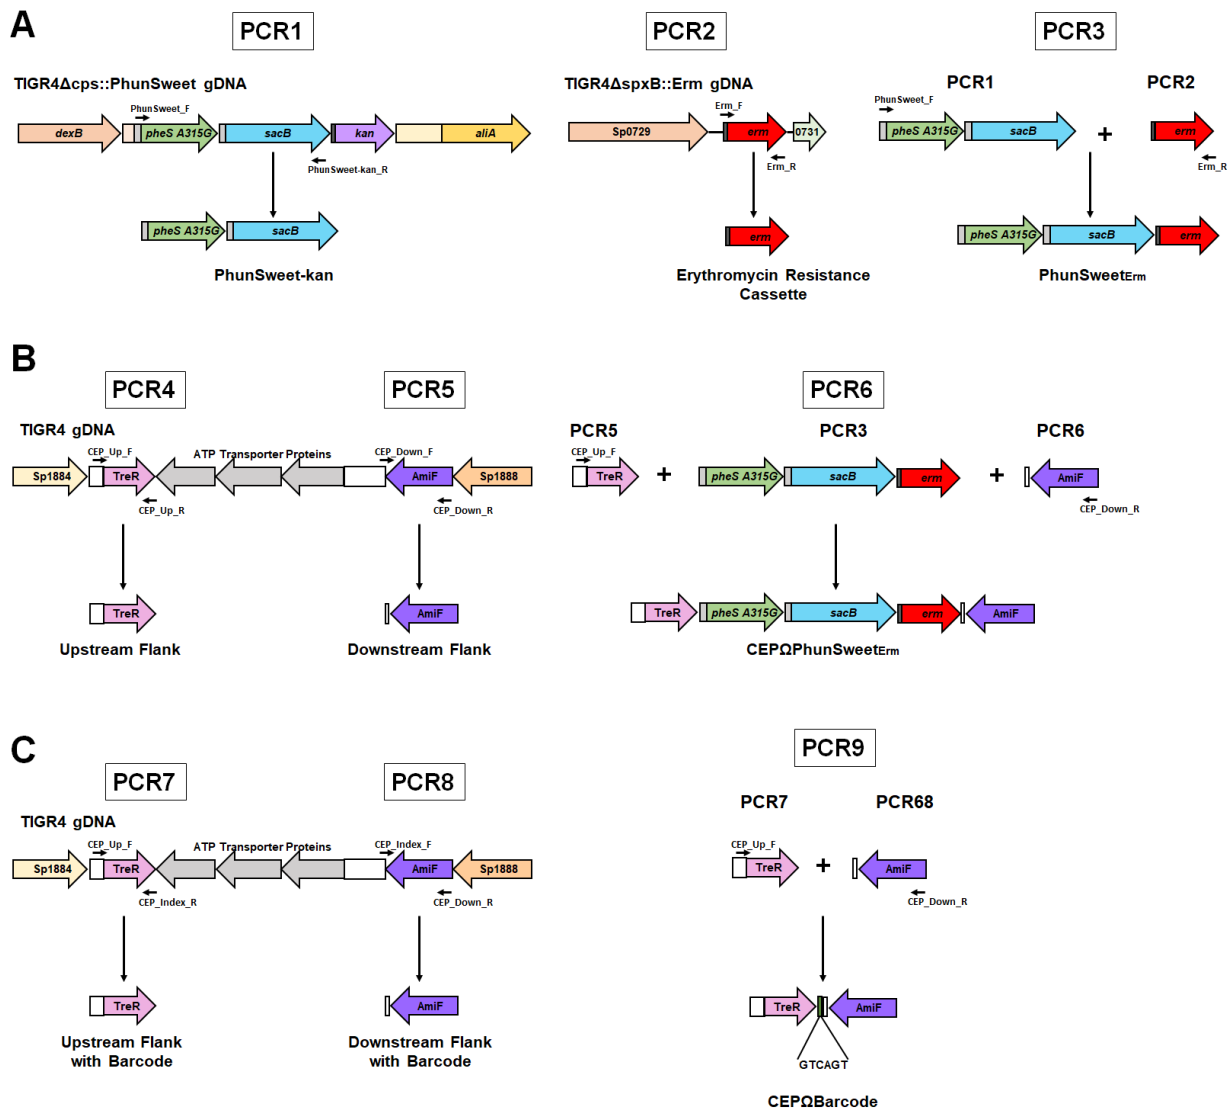

**Figure S7. PCR reactions used in the construction of barcoded pneumococcal T4 derivative strains.**

PCR products corresponding to (A) the PhunSweet-kan and erythromycin resistance fragments were amplified and fused via SOE reaction generating the PhunSweetErm cassette. (B) Upstream and downstream segments flanking the functionally inert CEP locus were PCR amplified and fused to the PhunSweetErm cassette for use as donor fragment in pneumococcal transformation. (C) The SOE PCR product containing the unique sequence identifiers flanked by TreR and AmiF CEP-adjacent genes was generated after amplification utilizing primers with unique index sequences.

**Table S1.** Penicillin minimum inhibitory concentration to strains used in this study.

| <b>Strain</b> | <b>ID</b>       | <b>Description</b>                 | <b>MIC<br/>(<math>\mu\text{g/mL}</math>)<br/>Penicillin</b> |
|---------------|-----------------|------------------------------------|-------------------------------------------------------------|
| T4            | T4              | Parent                             | 0.010                                                       |
| T4R1P         | T4+SV5          | 1 <sup>st</sup> recombinant        | 0.032                                                       |
| T4R2P.1       | T4+SV5+SV3      | 2 <sup>nd</sup> recombinant        | 0.047                                                       |
| T4R3P.1       | T4+SV5+SV3+SV11 | 3 <sup>rd</sup> recombinant        | 0.19                                                        |
| T4R2P.2       | T4+SV5+SV8      | 2 <sup>nd</sup> recombinant        | 0.047                                                       |
| T4R3P.2       | T4+SV5+SV8+SV4  | 3 <sup>rd</sup> recombinant        | 0.38                                                        |
| T4trDAW7      | T4trDAW7        | Pneumococcal recombinant           | 0.19                                                        |
| T4EP1         | T4 Pen Pop1     | Experimentally-evolved population  | 0.023                                                       |
| T4EP2         | T4 Pen Pop2     | Experimentally-evolved population  | 0.012                                                       |
| T4EP3         | T4 Pen Pop3     | Experimentally-evolved population  | 0.016                                                       |
| T4EP4         | T4 Pen Pop4     | Experimentally-evolved population  | 0.016                                                       |
| T4EP5         | P132C           | Experimentally-evolved population  | 0.032                                                       |
| T4EP6         | P232C           | Experimentally-evolved population  | 0.032                                                       |
| T4EP7         | P332C           | Experimentally-evolved population  | 0.023                                                       |
| T4EP8         | P432C           | Experimentally-evolved population  | 0.032                                                       |
| N132C         | N132C           | Penicillin-free evolved population | 0.012                                                       |
| N232C         | N232C           | Penicillin-free evolved population | 0.012                                                       |
| N332C         | N332C           | Penicillin-free evolved population | 0.006                                                       |
| N432C         | N432C           | Penicillin-free evolved population | 0.012                                                       |
| DAW7          | DAW7            | Pneumococcal clinical isolate      | 1                                                           |
| SV2           | SV2             | VGS clinical isolate               | 0.75                                                        |
| SV3           | SV3             | VGS clinical isolate               | 1.5                                                         |
| SV4           | SV4             | VGS clinical isolate               | 2                                                           |
| SV5           | SV5             | VGS clinical isolate               | 4                                                           |
| SV8           | SV8             | VGS clinical isolate               | >32                                                         |
| SV11          | SV11            | VGS clinical isolate               | 6                                                           |

**Table S2.** Primers used in the construction of barcoded T4 derivative strains.<sup>a</sup>

| Name            | Sequence                                                               |
|-----------------|------------------------------------------------------------------------|
| PhunSweet_F     | CAATTAAC TTTACAAATTCCCACTATTAAGG                                       |
| PhunSweet-kan_R | GTTTGCTTCTAAGTCTTATTTCCACTTTTGTGCCCGTGCTTATAAGGG                       |
| Erm_F           | GGAAATAAGACTTAGAAGCAAAC                                                |
| Erm_R           | CCAAATTTACAAAAGCGACTC                                                  |
| CEP_Up_F        | GCAAATCTTTGGCTTCTTGTCAAATTTTC                                          |
| CEP_Up_R        | ATAGTGGGAATTTGTAAAGTTAATTGGATCTGGTGTCTCAGTCTTTTATTTCTTGCG              |
| CEP_Down_F      | GAGTCGCTTTTGTAAATTTGGGGTCGCTGAAACTTCTATCGTCAAGAAG                      |
| CEP_Down_R      | CGTCCTTTCTTTTTTGATGTTCAAAGC                                            |
| CEP_Index1_F    | AAAGACTGAGACACCAGAT <b>CGTCAGT</b> TAATTTCCATAAAAAATTGACATGGAAATTATAAA |
| CEP_Index1_R    | CATGTCAATTTTTATGGGAATTA <b>ACTGAC</b> GATCTGGTGTCTCAGTCTTTTATTTCTTGCG  |
| CEP_Index2_F    | AAAGACTGAGACACCAGAT <b>CCAGCATA</b> ATTTCCATAAAAAATTGACATGGAAATTATAAA  |
| CEP_Index2_R    | CATGTCAATTTTTATGGGAATTA <b>TGCTGG</b> GATCTGGTGTCTCAGTCTTTTATTTCTTGCG  |
| CEP_Index3_F    | AAAGACTGAGACACCAGAT <b>CCAGTCATA</b> ATTTCCATAAAAAATTGACATGGAAATTATAAA |
| CEP_Index3_R    | CATGTCAATTTTTATGGGAATTA <b>TGACTG</b> GATCTGGTGTCTCAGTCTTTTATTTCTTGCG  |
| CEP_Index4_F    | AAAGACTGAGACACCAGAT <b>AGTAGT</b> TAATTTCCATAAAAAATTGACATGGAAATTATAAA  |
| CEP_Index4_R    | CATGTCAATTTTTATGGGAATTA <b>ACTACT</b> GATCTGGTGTCTCAGTCTTTTATTTCTTGCG  |
| CEP_Index5_F    | AAAGACTGAGACACCAGAT <b>TCATCATA</b> ATTTCCATAAAAAATTGACATGGAAATTATAAA  |
| CEP_Index5_R    | CATGTCAATTTTTATGGGAATTA <b>TGATGAG</b> ATCTGGTGTCTCAGTCTTTTATTTCTTGCG  |
| CEP_Index6_F    | AAAGACTGAGACACCAGAT <b>CGTTCAT</b> TAATTTCCATAAAAAATTGACATGGAAATTATAAA |
| CEP_Index6_R    | CATGTCAATTTTTATGGGAATTA <b>ATGAAC</b> GATCTGGTGTCTCAGTCTTTTATTTCTTGCG  |
| CEP_Index7_F    | AAAGACTGAGACACCAGAT <b>AGCAGG</b> TAATTTCCATAAAAAATTGACATGGAAATTATAAA  |
| CEP_Index7_R    | CATGTCAATTTTTATGGGAATTA <b>CCTGCT</b> GATCTGGTGTCTCAGTCTTTTATTTCTTGCG  |
| CEP_Index8_F    | AAAGACTGAGACACCAGAT <b>CAAGTATA</b> ATTTCCATAAAAAATTGACATGGAAATTATAAA  |
| CEP_Index8_R    | CATGTCAATTTTTATGGGAATTA <b>TACTTG</b> GATCTGGTGTCTCAGTCTTTTATTTCTTGCG  |
| CEP_Index9_F    | AAAGACTGAGACACCAGAT <b>TCGTCC</b> TAATTTCCATAAAAAATTGACATGGAAATTATAAA  |
| CEP_Index9_R    | CATGTCAATTTTTATGGGAATTA <b>GGACGA</b> GATCTGGTGTCTCAGTCTTTTATTTCTTGCG  |
| CEP_Index10_F   | AAAGACTGAGACACCAGAT <b>CGTTAAG</b> TAATTTCCATAAAAAATTGACATGGAAATTATAAA |
| CEP_Index10_R   | CATGTCAATTTTTATGGGAATTA <b>CTTAAC</b> GATCTGGTGTCTCAGTCTTTTATTTCTTGCG  |

<sup>a</sup>nucleotides in blue are a unique 6-nucleotide index per primer set

**Table S3.** Competency and  $\beta$ -lactam Resistance in select Streptococcal species

| Species                     | Natural Competence | $\beta$ -lactam Resistance | Reference                                                                                                                                        |
|-----------------------------|--------------------|----------------------------|--------------------------------------------------------------------------------------------------------------------------------------------------|
| <i>S. pneumoniae</i>        | Yes                | Yes                        | (Centers for Disease Control and Prevention, 2019; Jensen <i>et al.</i> , 2015) <sup>6,15</sup>                                                  |
| <i>S. pyogenes</i>          | No                 | No                         | (Mashburn-Warren <i>et al.</i> , 2012; Oppegaard <i>et al.</i> , 2020) <sup>20,22</sup>                                                          |
| <i>S. agalactiae</i>        | No                 | No                         | (Berg <i>et al.</i> , 2012; Fluegge <i>et al.</i> , 2004) <sup>1,25</sup>                                                                        |
| Viridans group streptococci |                    |                            |                                                                                                                                                  |
| <i>S. sanguinis</i>         | Yes                | Yes                        | (Gaustad, 1985; Pasquantonio <i>et al.</i> , 2012) <sup>2,3</sup>                                                                                |
| <i>S. salivarius</i>        | Yes                | Yes                        | (Fontaine <i>et al.</i> , 2010; Pasquantonio <i>et al.</i> , 2012) <sup>3,4</sup>                                                                |
| <i>S. mutans</i>            | Yes                | Yes                        | (Li <i>et al.</i> , 2001; Pasquantonio <i>et al.</i> , 2012) <sup>4,5</sup>                                                                      |
| <i>S. mitis</i>             | Yes                | Yes                        | (Konig <i>et al.</i> , 1998; Nakayama and Takao, 2003; Pasquantonio <i>et al.</i> , 2012; Salvadori <i>et al.</i> , 2018) <sup>4,6,7,16</sup>    |
| <i>S. oralis</i>            | Yes                | Yes                        | (Pasquantonio <i>et al.</i> , 2012; Ronda <i>et al.</i> , 1988; Sibold <i>et al.</i> , 1994; Todorova <i>et al.</i> , 2015) <sup>4,8,13,29</sup> |

## SUPPLEMENTAL REFERENCES

1. Berg, K.H., Ohnstad, H.S., and Havarstein, L.S. (2012). LytF, a novel competence-regulated murein hydrolase in the genus *Streptococcus*. *J Bacteriol* *194*, 627-635. 10.1128/JB.06273-11.
2. Gaustad, P. (1985). Genetic transformation in *Streptococcus sanguis*. Identification, surface spreading and competence of invasive strains of *Streptococcus sanguis* Lancefield groups H and W and other invasive viridans streptococci. *Acta Pathol Microbiol Immunol Scand B* *93*, 277-282.
3. Pasquantonio, G., Condo, S., Cerroni, L., Bikiqu, L., Nicoletti, M., Prenna, M., and Ripa, S. (2012). Antibacterial activity of various antibiotics against oral streptococci isolated in the oral cavity. *Int J Immunopathol Pharmacol* *25*, 805-809. 10.1177/039463201202500331.
4. Fontaine, L., Boutry, C., de Frahan, M.H., Delplace, B., Fremaux, C., Horvath, P., Boyaval, P., and Hols, P. (2010). A novel pheromone quorum-sensing system controls the development of natural competence in *Streptococcus thermophilus* and *Streptococcus salivarius*. *J Bacteriol* *192*, 1444-1454. 10.1128/JB.01251-09.
5. Li, Y.H., Lau, P.C., Lee, J.H., Ellen, R.P., and Cvitkovitch, D.G. (2001). Natural genetic transformation of *Streptococcus mutans* growing in biofilms. *J Bacteriol* *183*, 897-908. 10.1128/JB.183.3.897-908.2001.
6. Konig, A., Reinert, R.R., and Hakenbeck, R. (1998). *Streptococcus mitis* with unusually high level resistance to beta-lactam antibiotics. *Microb Drug Resist* *4*, 45-49. 10.1089/mdr.1998.4.45.
7. Salvadori, G., Junges, R., Amdal, H.A., Chen, T., Morrison, D.A., and Petersen, F.C. (2018). High-resolution profiles of the *Streptococcus mitis* CSP signaling pathway reveal core and strain-specific regulated genes. *BMC Genomics* *19*, 453. 10.1186/s12864-018-4802-y.
8. Ronda, C., Garcia, J.L., and Lopez, R. (1988). Characterization of genetic transformation in *Streptococcus oralis* NCTC 11427: expression of the pneumococcal amidase in *S. oralis* using a new shuttle vector. *Mol Gen Genet* *215*, 53-57. 10.1007/BF00331302.
